# Supplementary material for: What Can Meal Observations Tell Us about Eating Behavior in Malnourished Children?
Source: MDPI journal article supplement (doi:10.3390/ijerph16122197), 2019-06-21

a. Child eating behaviour across meal, by type of food offered

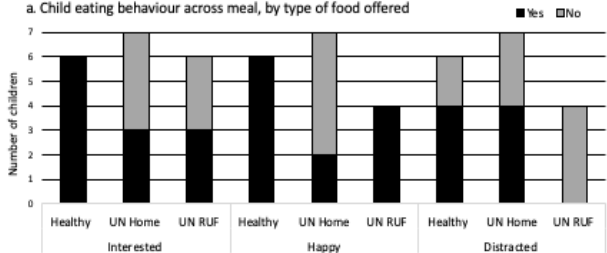

b. Caregiver feeding behaviour across meal, by type of food offered

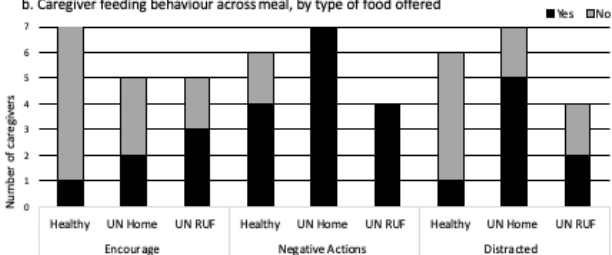

Supplement: s1 [file s1]
