# Supplementary figures and images for: What Can Meal Observations Tell Us about Eating Behavior in Malnourished Children?
Source: MDPI journal article supplement (doi:10.3390/ijerph16122197), 2019-06-21

### a. Interest in food

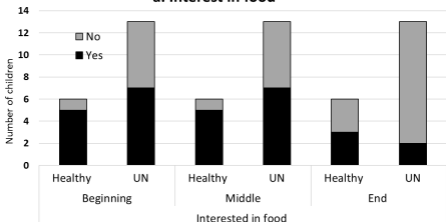

### b. Mood during meal

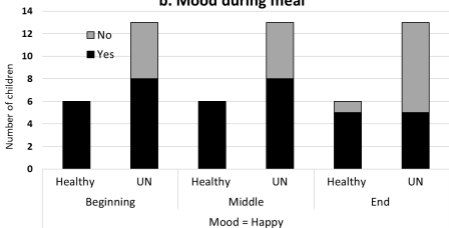

### c. Attention to meal

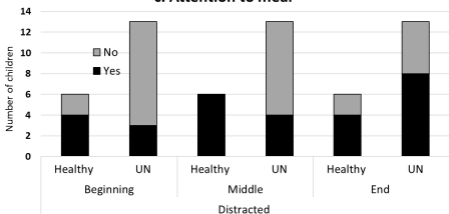

Supplement: s1 [file s1]

### a. Caregiver encouragement

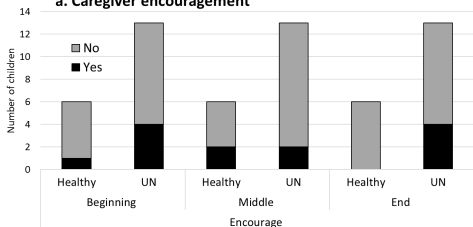

### b. Caregiver negative actions

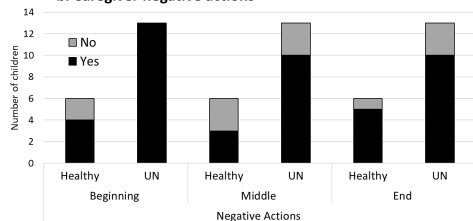

### c. Caregiver distraction

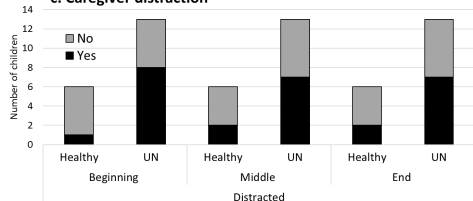

Supplement: s1 [file s1]
